# Supplementary material for: Ti3C2Tx MXene nanosheet-confined Pt nanoparticles efficiently catalyze dye-sensitized photocatalytic hydrogen evolution reaction
Source: Royal Society of Chemistry journal article supplement (doi:10.1039/c9cc05489h), 2019-01-01
Supplement: c9cc05489h1.pdf [file c9cc05489h1.pdf]

## Electronic Supplementary Information

### **Ti<sub>3</sub>C<sub>2</sub>T<sub>x</sub> MXene nanosheet-confined Pt nanoparticles efficiently catalyze dye-sensitized photocatalytic hydrogen evolution**

Shixiong Min,<sup>\*a,b,c</sup> Yuan Xue,<sup>a,b,c</sup> Fang Wang,<sup>\*a,b,c</sup> Zhengguo Zhang<sup>a,b,c</sup> and Haitao Zhu<sup>a,b,c</sup>

<sup>a</sup> *School of Chemistry and Chemical Engineering, Key Laboratory of Electrochemical Energy Conversion Technology and Application, North Minzu University, Yinchuan, 750021, P. R. China. E-mail: sxmin@nun.edu.cn.*

<sup>b</sup> *Key Laboratory of Chemical Engineering and Technology, State Ethnic Affairs Commission, North Minzu University, Yinchuan, 750021, P. R. China.*

<sup>c</sup> *Ningxia Key Laboratory of Solar Chemical Conversion Technology, North Minzu University, Yinchuan 750021, P. R. China.*

## 1. Experimental

### 1.1 Chemicals and materials

All chemicals were of analytical grade and used as received without further purification. Triethanolamine (TEOA) was purchased from Xilong Scientific (>99.8%). Erythrosin B (ErB) was received from Tianjin Guangfu Fine Chemical Research Institute.  $\text{Ti}_3\text{AlC}_2$  powders were purchased from Beijing Dk Nano technology Co., Ltd. LiF was purchased from Aladdin Industrial Corporation. Graphene nanosheets (3 nm flakes) for R&D use was kindly provided by Uniregion Bio-Tech Company. g- $\text{C}_3\text{N}_4$  nanosheets were prepared by pyrolyzing urea at 823 K for 2 h according to our previous reports.<sup>1</sup> All solutions used throughout the experiments were prepared with ultrapure water (18.2 M $\Omega$ ).

### 1.2 Preparation of $\text{Ti}_3\text{C}_2\text{T}_x$ nanosheets ( $\text{Ti}_3\text{C}_2\text{T}_x$ NSs)

$\text{Ti}_3\text{C}_2\text{T}_x$  NSs were synthesized according to a reported procedure.<sup>2</sup> 1 g of LiF was added into 20 mL of 6 M HCl and the solution was allowed to mix thoroughly at room temperature for a few minutes. After that, 1 g of  $\text{Ti}_3\text{AlC}_2$  powder was slowly added to avoid initial overheating due to exothermic nature of the reaction. Then, the temperature was brought to 35 °C and the reaction allowed to proceed under continuous stirring for 24 h. The powder was repeatedly washed with DI water until almost neutral pH ( $\geq 6$ ). The freshly produced powder was then bath sonicated in 100 mL of DI water for 30 min under continuous  $\text{N}_2$  bubbling to minimize oxidation. Then, the resulted suspension solution was centrifuged at 3500 rpm for 1 h and the supernatant, a colloidal solution of  $\text{Ti}_3\text{C}_2\text{T}_x$  MXene nanosheets, was collected and freezing-dried.

### 1.3 Characterization

X-ray diffraction (XRD) patterns were investigated with a Rigaku smartlab diffractometer with a nickel filtrated Cu  $K\alpha$  radiation. Transmission electron microscopy (TEM) and high-resolution TEM (HRTEM) images were taken with a Tecnai-G2-F30 field emission transmission electron microscope. X-ray photoelectron spectroscopy (XPS) measurements of the samples were performed on a Thermo Scientific Escalab-250Xi electron spectrometer using an Al  $K\alpha$  X-ray source. Binding energies were referenced to the C 1s peak (set at 284.8 eV) of the  $\text{sp}^2$  hybridized (C=C) carbon from the sample. UV-

vis absorption spectra were taken with a Thermo Scientific-Evolution 220 spectrophotometer. Photoluminescence spectra were determined by a Horiba Scientific FluoroMax-4 spectrofluorometer spectrometer. The methylene blue (MB) adsorption method was also used to determine the specific surface area of  $\text{Ti}_3\text{C}_2\text{T}_x$  NSs. Briefly, 10 mg of  $\text{Ti}_3\text{C}_2\text{T}_x$  NSs was dispersed into an excessive amount of MB aqueous solution ( $0.1 \text{ mg mL}^{-1}$ , 100 mL) in an airtight glass and the resulting mixture was stirred for 12 h at room temperature in the dark. After filtration, the concentration of the MB in the filtrate was measured at 665 nm using a spectrophotometer. The specific surface area of the  $\text{Ti}_3\text{C}_2\text{T}_x$  NSs was determined based on the adsorbed MB ( $2450 \text{ m}^2 \text{ g}^{-1}$ ).<sup>3</sup>

#### 1.4 Photocatalytic $\text{H}_2$ evolution experiments

The photocatalytic  $\text{H}_2$  evolution experiments were performed in a sealed Pyrex reactor with a top flat quartz window for light irradiation and a silicone rubber septum was fixed on its side for sampling produced  $\text{H}_2$  in the headspace of reaction cell. In a typical procedure, ErB (0.2 mM),  $\text{Ti}_3\text{C}_2\text{T}_x$  NSs (10 mg), and calculated amount (1.3, 2.6, 5.2, 10.5, and 21.4  $\mu\text{M}$ , corresponding to Pt mass loadings of 0.25, 0.5, 1, 2, and 4 wt.% on  $\text{Ti}_3\text{C}_2\text{T}_x$  NSs, respectively) of  $\text{H}_2\text{PtCl}_6$  aqueous solution were added to the reaction cell containing 100 mL of 10 vol.% TEOA aqueous solution under vigorous stirring. The pH values of the reaction solution were adjusted by addition of hydrochloric acid or sodium hydroxide. Then, the reaction solution was thoroughly degassed by repeated evacuation- $\text{N}_2$  filling, and finally refilled with  $\text{N}_2$  to reach ambient pressure. After that, the reaction solution was irradiated by a 520 nm LED lamp. During the reaction, the mixture solution was continuously stirred. The amount of  $\text{H}_2$  produced was manually taken out by a gas-tight syringe (Agilent, 1.0 mL) and analyzed at given time intervals with a gas chromatography (Tech comp; GC-7900) with a thermal conductivity detector, a 5 Å molecular sieve column, and with  $\text{N}_2$  as carrying gas.

The monochromatic apparent quantum yield (AQY) of the  $\text{H}_2$  evolution were measured under conditions similar to those in the above photocatalytic reaction. The photon flux of incident light was determined using a ray virtual radiation actinometer (Apogee MQ-500, a silicon ray detector, light spectrum, 389-692 nm; measurement range, 0–4000  $\mu\text{mol m}^{-2}\cdot\text{s}^{-1}$ ). The AQY was calculated from the ratio of the number of reacted electrons during  $\text{H}_2$

evolution to the number of incident photons.

## 2. Additional data

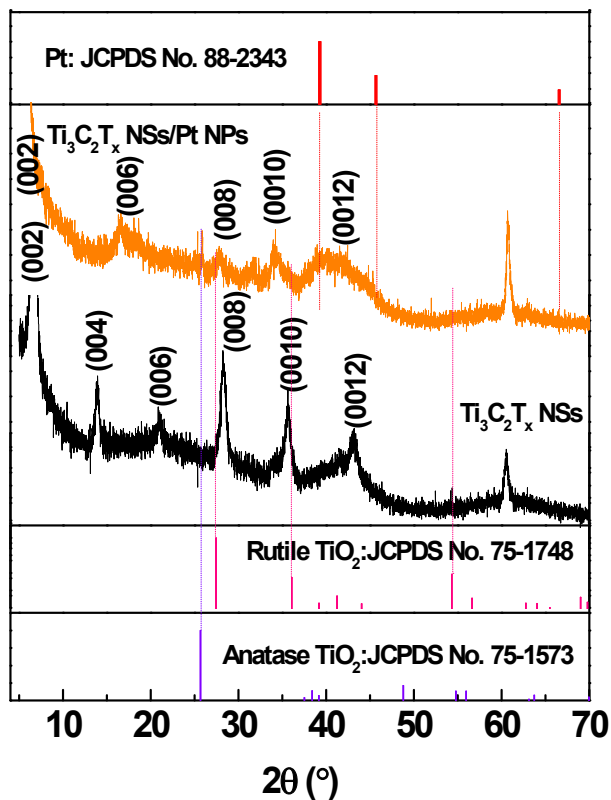

**Fig. S1** Enlarged PXRD patterns of Ti<sub>3</sub>C<sub>2</sub>T<sub>x</sub> NSs and Ti<sub>3</sub>C<sub>2</sub>T<sub>x</sub> NSs/Pt NPs along with the standard PXRD patterns of anatase TiO<sub>2</sub>, rutile TiO<sub>2</sub>, and Pt.

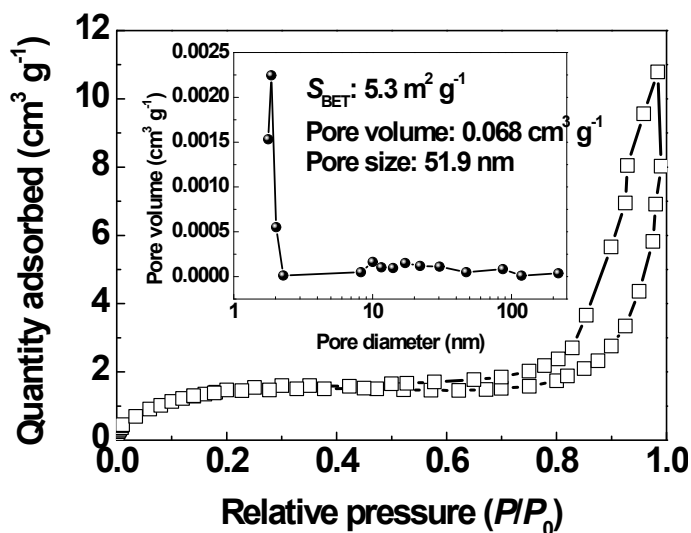

**Fig. S2** N<sub>2</sub> adsorption-desorption isotherm and pore size distribution (inset) of Ti<sub>3</sub>C<sub>2</sub>T<sub>x</sub> NSs.

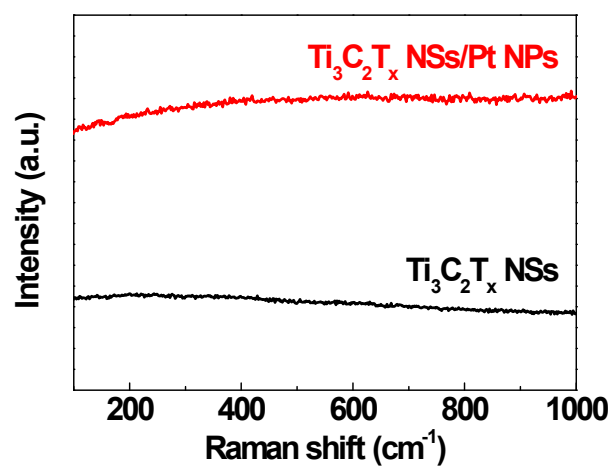

**Fig. S3** Raman spectra of Ti<sub>3</sub>C<sub>2</sub>T<sub>x</sub> NSs and Ti<sub>3</sub>C<sub>2</sub>T<sub>x</sub> NSs/Pt NPs

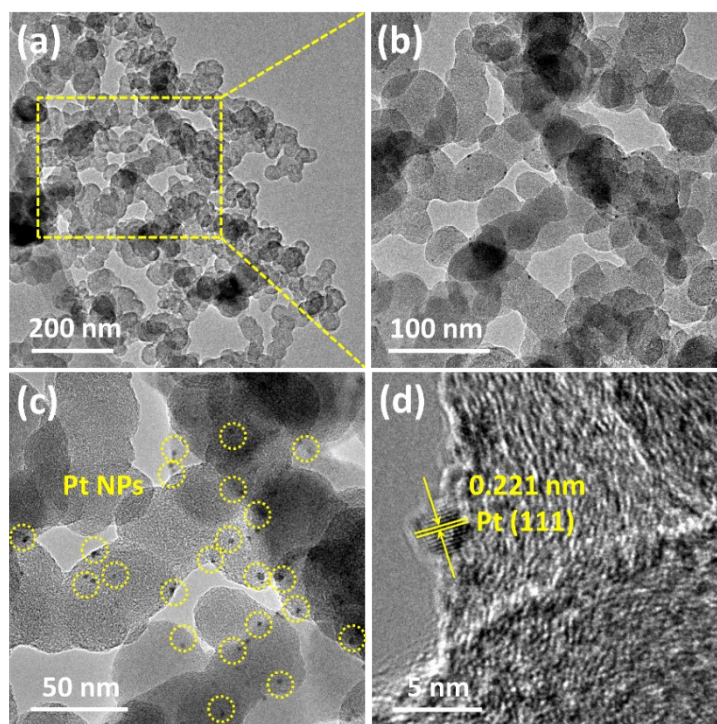

**Fig. S4** TEM and HRTEM images of in situ grown free Pt NPs adsorbed on carbon black (Super P).

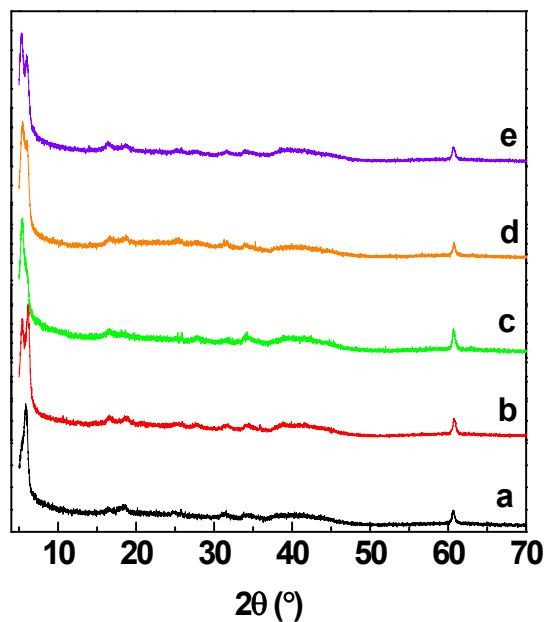

**Fig. S5** XRD patterns of  $\text{Ti}_3\text{C}_2\text{T}_x$  NSs/Pt NPs prepared by adding different concentrations of Pt precursor: (a)  $1.3 \mu\text{M}$ , (b)  $2.6 \mu\text{M}$ , (c)  $5.2 \mu\text{M}$ , (d)  $10.5 \mu\text{M}$ , and (e)  $21.4 \mu\text{M}$ .

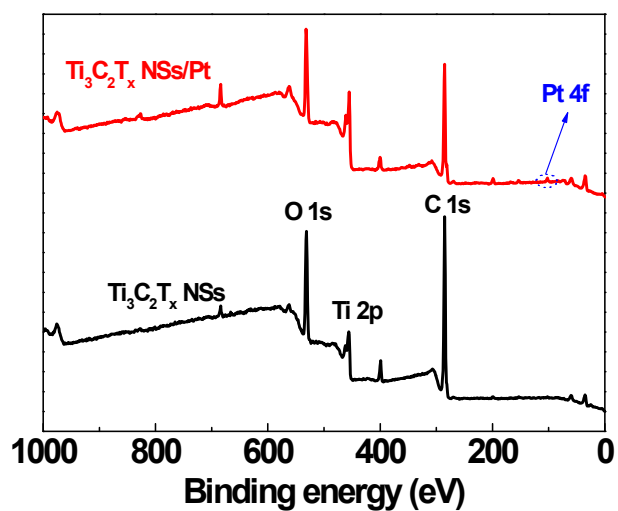

**Fig. S6** XPS survey spectra of  $\text{Ti}_3\text{C}_2\text{T}_x$  NSs and  $\text{Ti}_3\text{C}_2\text{T}_x$  NSs/Pt NPs prepared at a Pt concentration of  $5.2 \mu\text{M}$ .

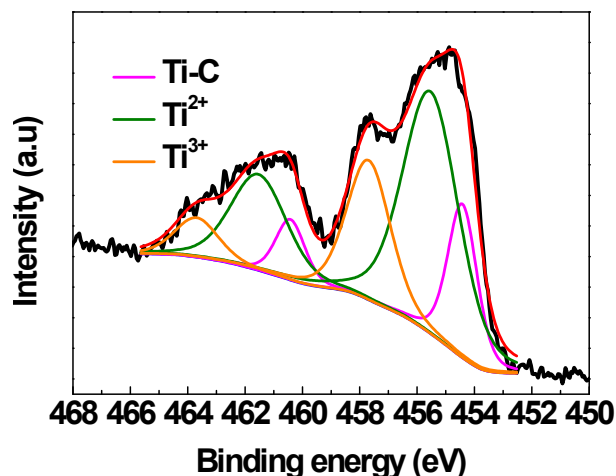

**Fig. S7** XPS spectrum of Ti 2p for  $\text{Ti}_3\text{C}_2\text{T}_x$  NSs.

**Table S1** The fitting results of XPS spectra of Ti 2p and Pt 4f core levels for  $\text{Ti}_3\text{C}_2\text{T}_x$  NSs and  $\text{Ti}_3\text{C}_2\text{T}_x$  NSs/Pt NPs.

| Sample                                                                   | Ti-C              | Ti <sup>2+</sup>  | Ti <sup>3+</sup>  | Pt                                   |                                       |
|--------------------------------------------------------------------------|-------------------|-------------------|-------------------|--------------------------------------|---------------------------------------|
|                                                                          | 2p3/2 (eV)<br>(%) | 2p3/2 (eV)<br>(%) | 2p3/2 (eV)<br>(%) | Pt <sup>0</sup><br>4f7/2 (eV)<br>(%) | Pt <sup>δ+</sup><br>4f7/2 (eV)<br>(%) |
| $\text{Ti}_3\text{C}_2\text{T}_x$ NSs                                    | 454.42<br>(19.1%) | 455.53<br>(57.3%) | 457.69<br>(23.6%) | /                                    | /                                     |
| $\text{Ti}_3\text{C}_2\text{T}_x$ NSs/Pt NPs                             | 453.99<br>(29.1%) | 455.21<br>(54.1%) | 457.73<br>(16.8%) | 70.32<br>(66.1%)                     | 71.39<br>(33.9%)                      |
| $\text{Ti}_3\text{C}_2\text{T}_x$ NSs/Pt NPs<br>after HER stability test | 453.84<br>(34.6%) | 455.10<br>(40.1%) | 457.39<br>(25.3%) | 70.67<br>(100%)                      | 0                                     |

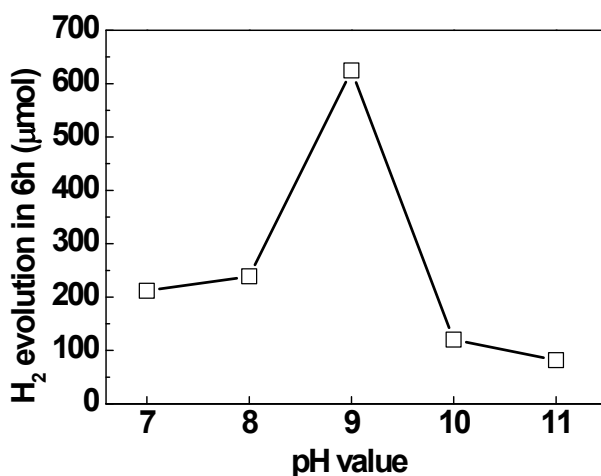

**Fig. S8** Effect of the pH value on the  $\text{H}_2$  evolution activity of  $\text{Ti}_3\text{C}_2\text{T}_x$  NSs/Pt NPs catalyst in ErB-TEOA system. Reaction conditions:  $\text{Ti}_3\text{C}_2\text{T}_x$  NSs, 10 mg; Pt, 5.2  $\mu\text{M}$ ; ErB, 0.2 mM; 100 mL TEOA solution; light source, 520 nm LED lamp.

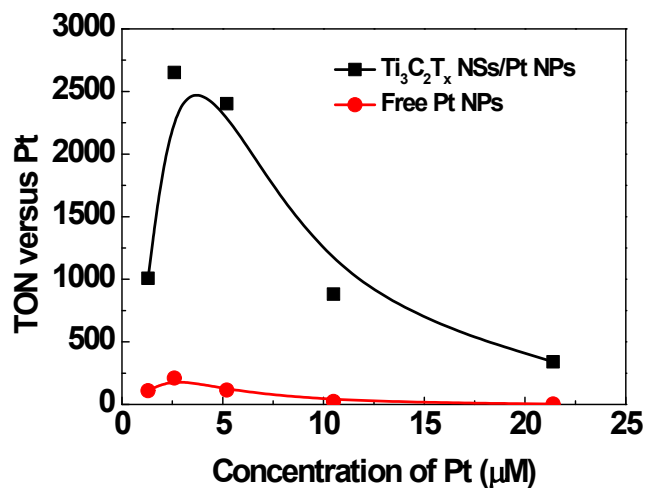

**Fig. S9** TONs of H<sub>2</sub> evolution activity based on Pt used for Ti<sub>3</sub>C<sub>2</sub>T<sub>x</sub> NSs/Pt NPs and free Pt NPs in ErB-TEOA system. Reaction conditions: Ti<sub>3</sub>C<sub>2</sub>T<sub>x</sub> NSs, 10 mg; ErB, 0.2 mM; 100 mL TEOA solution, pH 9; light source, 520 nm LED lamp.

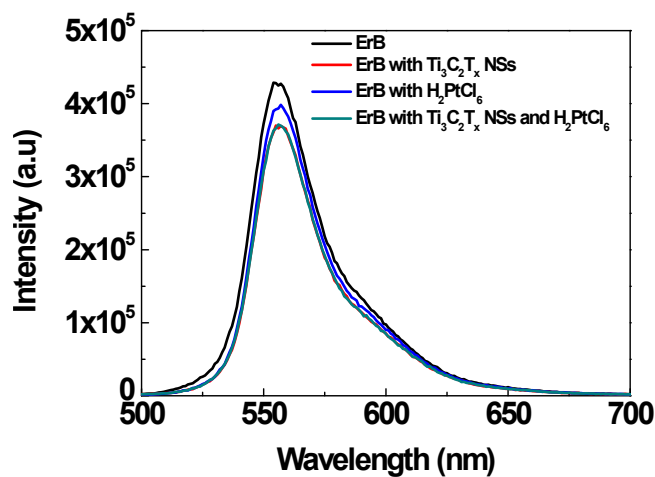

**Fig. S10** PL spectra of ErB solution in the presence of Ti<sub>3</sub>C<sub>2</sub>T<sub>x</sub> NSs, H<sub>2</sub>PtCl<sub>6</sub>, or both Ti<sub>3</sub>C<sub>2</sub>T<sub>x</sub> NSs and H<sub>2</sub>PtCl<sub>6</sub>. Excitation wavelength: 480 nm.



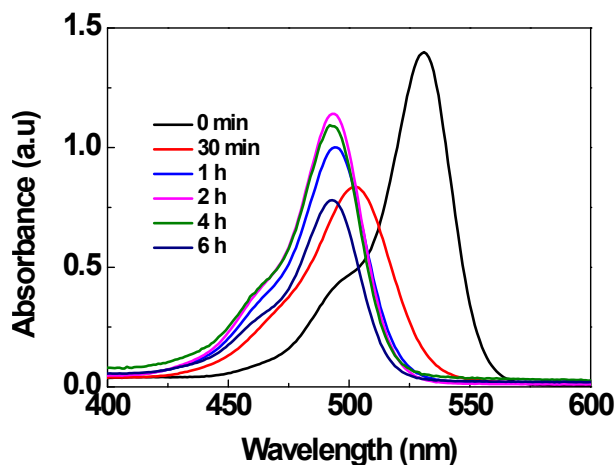

**Fig. S11** Time-dependent UV-vis absorption spectra of the photocatalytic reaction systems. Reaction conditions: Ti<sub>3</sub>C<sub>2</sub>T<sub>x</sub> NSs, 10 mg; ErB, 0.2 mM; 100 mL TEOA solution, pH 9; light source, 520 nm LED lamp. The in situ formed Ti<sub>3</sub>C<sub>2</sub>T<sub>x</sub> NSs/Pt NPs catalyst was removed by centrifugation and the remaining solution was diluted by 10 times.

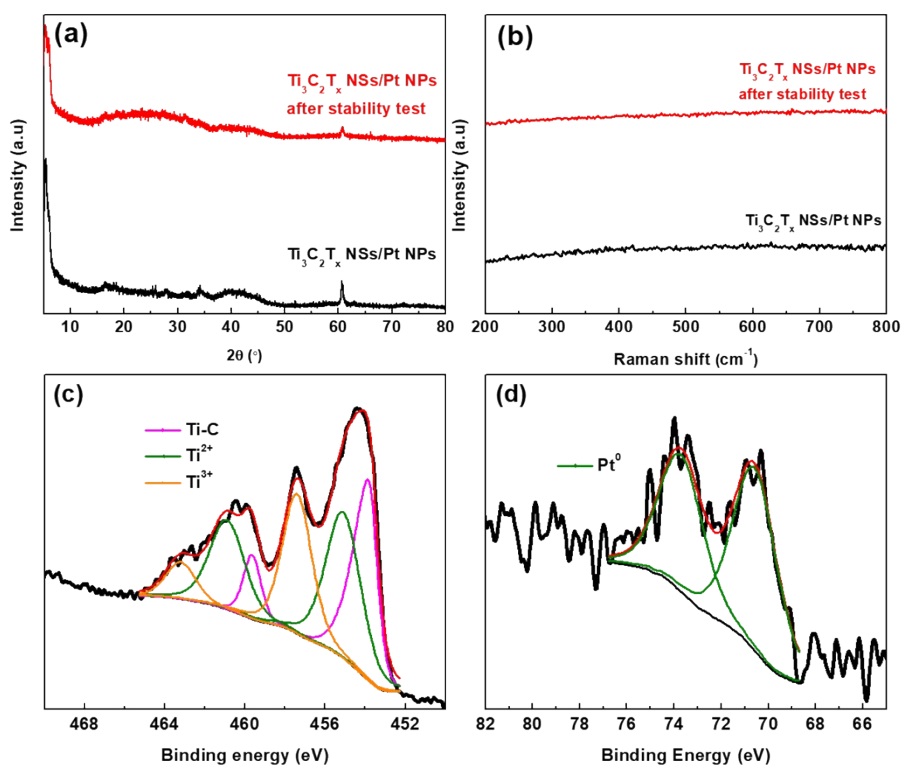

**Fig. S12** (a) XRD patterns and (b) Raman spectra of Ti<sub>3</sub>C<sub>2</sub>T<sub>x</sub> NSs/Pt NPs catalyst before and after stability test. XPS spectra of (c) Ti 2p and (d) Pt 4f of the Ti<sub>3</sub>C<sub>2</sub>T<sub>x</sub> NSs/Pt NPs catalyst after stability test.

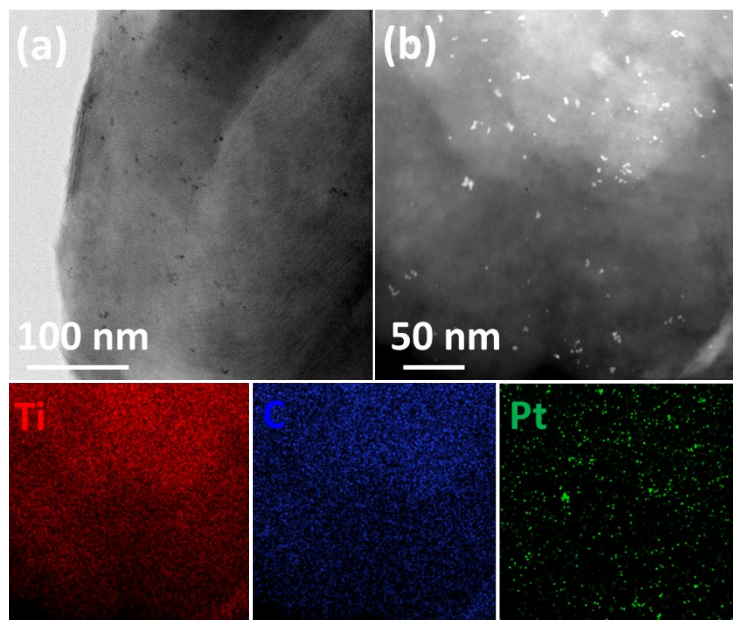

**Fig. S13** (a) TEM and (b) HAADF-STEM images and corresponding element mappings of the  $\text{Ti}_3\text{C}_2\text{T}_x$  NSs/Pt NPs catalyst after stability test.

#### References

1. Y. Xue, Y. G. Lei, X. Y. Liu, Y. N. Li, W. A. Deng, F. Wang and S. X. Min, *New J. Chem.*, 2018, **42**, 14083.
2. A. Lipatov, M. Alhabeab, M. R. Lukatskaya, A. Boson, Y. Gogotsi and A. Sinitskii, *Adv. Electron. Mater.*, 2016, **2**, 1600255.
3. X. Y. Liu, S. X. Min, Y. Xue, L. Tian, Y. G. Lei and F. Wang, *New J. Chem.*, 2019, **43**, 4152.
